# Supplementary material for: Progesterone for women with threatened miscarriage (STOP trial): a placebo-controlled randomized clinical trial
Source: PubMed Central journal article supplement — Hum Reprod. 2023 Feb 20;38(4):560–8. doi: 10.1093/humrep/dead029 (PMC10069850; doi:10.1093/humrep/dead029), 2023-02-20
Supplement: dead029_supplementary_table_si.pdf [file dead029_supplementary_table_si.pdf]

human reproduction **SUPPLEMENTARY DATA**

**Supplementary Table S1 Treatment outcomes—per protocol analysis.**

|                                           | <b>Progesterone<br/>(N = 79)</b> | <b>Placebo<br/>(N = 78)</b> |            |                |                 |
|-------------------------------------------|----------------------------------|-----------------------------|------------|----------------|-----------------|
| <b>Binary outcomes</b>                    |                                  |                             |            |                |                 |
|                                           | <b>n/N (%)</b>                   | <b>n/N (%)</b>              | <b>RR*</b> | <b>95% CI*</b> | <b>P-value*</b> |
| Live birth                                | 64/79 (81.0)                     | 65/77 (84.4)                | 0.96       | 0.83–1.11      | 0.574           |
| Miscarriage                               | 13/79 (16.5)                     | 12/77 (15.6)                | 1.06       | 0.51–2.17      | 0.882           |
| < 12 weeks                                | 8/77 (10.4)                      | 7/76 (9.2)                  | 1.13       | 0.43–2.96      | 0.806           |
| 12–20 weeks                               | 3/77 (3.9)                       | 4/76 (5.3)                  | 0.74       | 0.174–3.2      | 0.687           |
| Pregnancy loss between 20 and 23 weeks    | 2/79 (2.5)                       | 0/77 (0.0)                  | NA         | NA             | NA              |
| Preterm birth                             | 9/78 (11.5)                      | 7/76 (9.2)                  | 1.25       | 0.49–3.19      | 0.637           |
| Preterm birth before 35 weeks             | 6/78 (7.7)                       | 4/76 (5.3)                  | 1.46       | 0.43–4.98      | 0.544           |
| Preterm birth before 32 weeks             | 5/78 (6.4)                       | 2/76 (2.6)                  | 2.44       | 0.49–12.18     | 0.278           |
| Preterm birth before 28 weeks             | 5/78 (6.4)                       | 2/76 (2.6)                  | 2.44       | 0.49–12.18     | 0.278           |
| Small for gestational age                 | 2/63 (3.2)                       | 2/63 (3.2)                  | 1          | 0.15–6.88      | 1               |
| PPROM                                     | 7/75 (9.3)                       | 5/75 (6.7)                  | 1.4        | 0.47–4.21      | 0.55            |
| Threatened preterm labour                 | 11/75 (14.7)                     | 8/74 (10.8)                 | 1.36       | 0.58–3.18      | 0.483           |
| Antepartum haemorrhage                    | 4/75 (5.3)                       | 13/74 (17.6)                | 0.3        | 0.1–0.89       | 0.03            |
| Gestational diabetes                      | 9/75 (12.0)                      | 15/75 (20.0)                | 0.6        | 0.28–1.29      | 0.189           |
| Gestational hypertension                  | 6/75 (8.0)                       | 5/75 (6.7)                  | 1.2        | 0.38–3.76      | 0.755           |
| Pre-eclampsia                             | 2/75 (2.7)                       | 3/75 (4.0)                  | 0.67       | 0.11–3.88      | 0.652           |
| Venous thromboembolism                    | 3/67 (4.5)                       | 0/66 (0.0)                  | NA         | NA             | NA              |
| Postnatal depression                      | 0/64 (0.0)                       | 5/64 (7.8)                  | NA         | NA             | NA              |
| Vaginal birth                             | 43/78 (55.1)                     | 33/76 (43.4)                | 1.27       | 0.92–1.76      | 0.151           |
| Assisted vaginal birth                    | 9/78 (11.5)                      | 8/76 (10.5)                 | 1.1        | 0.45–2.69      | 0.841           |
| Elective caesarean                        | 12/78 (15.4)                     | 16/76 (21.1)                | 0.73       | 0.37–1.44      | 0.365           |
| Emergency caesarean                       | 10/78 (12.8)                     | 16/76 (21.1)                | 0.61       | 0.30–1.26      | 0.179           |
| Congenital anomaly                        | 7/72 (9.7)                       | 2/71 (2.8)                  | 3.45       | 0.74–16.05     | 0.114           |
| Nursery admission                         | 16/77 (20.8)                     | 11/73 (15.1)                | 1.38       | 0.69–2.77      | 0.367           |
| Neonatal mortality                        | 1/79 (1.3)                       | 0/76 (0.0)                  | NA         | NA             | NA              |
| <b>Continuous outcomes</b>                |                                  |                             |            |                |                 |
|                                           | <b>Median (IQR)</b>              | <b>Median (IQR)</b>         |            |                | <b>P-value#</b> |
| Gestational age at birth (weeks)          | 39.0 (38.0–39.9)                 | 39.0 (37.9–40.0)            |            |                | 0.807           |
| Birth weight (g)                          | 3390 (2962–3657)                 | 3290 (2900–3730)            |            |                | 0.798           |
| Depression score (at end of intervention) | 2 (0–4)                          | 0 (0–2)                     |            |                | 0.212           |
| Anxiety score (at end of intervention)    | 2 (0–6)                          | 2 (0–6)                     |            |                | 0.849           |
| Stress score (at end of intervention)     | 4 (2–10)                         | 4 (0–10)                    |            |                | 0.277           |
| Depression score (postpartum)             | 0 (0–2)                          | 2 (0–4)                     |            |                | 0.64            |
| Anxiety score (postpartum)                | 0 (0–4)                          | 0 (0–2)                     |            |                | 0.734           |
| Stress score (postpartum)                 | 6 (2–8)                          | 4 (0–8)                     |            |                | 0.349           |

\*Results of log-binomial regressions.

#Results of Wilcoxon rank-sum test.

RR: risk ratio; PPRM: preterm prelabour rupture of membranes; IQR: interquartile range.
